# Supplementary material for: Does the Potential for Chaos Constrain the Embryonic Cell-Cycle Oscillator?
Source: PLOS journal article supplement (doi:10.1371/journal.pcbi.1002109), 2011-07-14
Supplement: S11 (10.1371/journal.pcbi.1002109.s011) [file journal.pcbi.1002109.s011]

301 Moved Permanently

# Moved Permanently

The document has moved here.

---

Apache Server at www.ploscompbiol.org Port 80
