# Supplementary material for: Does the Potential for Chaos Constrain the Embryonic Cell-Cycle Oscillator?
Source: PLoS Comput Biol. 2011 Jul 14;7(7):e1002109. doi: 10.1371/journal.pcbi.1002109 (PMC3136431; doi:10.1371/journal.pcbi.1002109)
Supplement: Text S1 — Supporting information. (PDF) [file pcbi.1002109.s011.pdf]

## Text S1

Does the potential for chaos constrain the embryonic cell-cycle oscillator?

R. Scott McIsaac<sup>1,2,\*</sup>, Kerwyn Casey Huang<sup>3,\*</sup>, Anirvan Sengupta<sup>4,5</sup>, Ned S. Wingreen<sup>1,6,†</sup>

<sup>1</sup>Lewis-Sigler Institute for Integrative Genomics, Princeton University, Princeton, NJ 08544

<sup>2</sup>Graduate Program in Quantitative and Computational Biology, Princeton University, Princeton, NJ 08544

<sup>3</sup>Department of Bioengineering, Stanford University, Stanford, CA 94305

<sup>4</sup>Department of Physics & Astronomy, Rutgers University, Piscataway, NJ 08854

<sup>5</sup>BioMAPS Institute for Quantitative Biology, Rutgers University, Piscataway, NJ 08854

<sup>6</sup>Department of Molecular Biology, Princeton University, Princeton, NJ 08544

\*These authors contributed equally to this work.

†To whom correspondence should be addressed;

Department of Molecular Biology

119 Lewis Thomas Laboratory

Princeton, NJ 08544 USA;

E-mail: wingreen@princeton.edu

Phone: (609)-258-8476

# Cell-cycle model

The most current model of the embryonic cell cycle in *X. laevis* was derived by Pomerening *et al.* [1] In the current study, we extended this model to include a spatial component. Simulations were performed in 1D and 3D geometries, with all species able to diffuse.

At a qualitative level, oscillations in Cdk1 activity are driven by dual fast positive feedbacks and a slower negative feedback. The period of the oscillations is determined by the rate of cyclin B synthesis [2]. Cdk1 binds cyclin B (forming Cyclin B-Cdk1), and, upon activation, the active Cyclin B-Cdk1 complex phosphorylates the mitotic substrates that transition the cell from interphase to M-phase. The transition from M-phase back to interphase is driven by anaphase-promoting complex (APC)-mediated polyubiquitination of cyclin B [3, 4, 5].

In the Pomerening *et al.* [1] model, the dynamics of cyclin B and the phosphorylated/dephosphorylated states of the Cyclin B-Cdk1 complex are explicitly modeled. Phosphorylation at Tyr-15 results in inactivation of the Cyclin B-Cdk1 complex; namely, Cyclin B-Cdk1-Yp and Cyclin B-Cdk1-YpTp (also phosphorylated at Thr-14) are inactive. The complex Cyclin B-Cdk1-Tp is phosphorylated at Thr-14 and lacks phosphorylation at Tyr-15.

To achieve negative feedback, the presence of the complex Cyclin B-Cdk1-Tp results in activation of the polo-like kinase,  $\text{Plx1}|_{\text{act}}$ .  $\text{Plx1}|_{\text{act}}$  then phosphorylates and activates the anaphase-promoting complex,  $\text{APC}|_{\text{act}}$ , which destroys cyclins and Cyclin B-Cdk1 complexes. Dual positive feedbacks are achieved through the Cyclin B-Cdk1-Tp-mediated activation of the Tyr-15 phosphatase,  $\text{Cdc25}|_{\text{act}}$ , and the Cyclin B-Cdk1-Tp-mediated inactivation of the Tyr-15 kinase  $\text{Wee1}|_{\text{act}}$ .

Central parameters in the model include  $k_{\text{synth}}$ , the rate of cyclin B synthesis;  $k_{\text{dest}}$ , the rate at which active APC destroys cyclins; and  $r$ , the strength of the positive feedbacks. The active forms of Cdc25 and Wee1 ( $\text{Cdc25}|_{\text{act}}$  and  $\text{Wee1}|_{\text{act}}$ ) have phosphatase and kinase activities given by  $k_{\text{cdc25}}$  and  $k_{\text{wee1}}$ , respectively. The basal activities of Cdc25 and Wee1 are  $k_{\text{wee1}}/r$  and  $k_{\text{cdc25}}/r$ , where the parameter  $r$  is the fraction of phosphatase/kinase activity in interphase versus M-phase. When  $r = 1$ , the model becomes negative-feedback-only.

$$\begin{aligned}
 \frac{\partial[\text{Cyclin B}]}{\partial t} &= D\nabla^2[\text{Cyclin B}] \\
 &\quad + k_{\text{synth}} - k_{\text{dest}}[\text{APC}]_{\text{act}}[\text{Cyclin B}] - k_a ([\text{Cdk1}]_{\text{tot}} \\
 &\quad - [\text{Cyclin B-Cdk1}] - [\text{Cyclin B-Cdk1-Yp}] \\
 &\quad - [\text{Cyclin B-Cdk1-YpTp}] - [\text{Cyclin B-Cdk1-Tp}]) [\text{Cyclin B}] \\
 &\quad + k_d[\text{Cyclin B-Cdk1}] \\
 \frac{\partial[\text{Cyclin B-Cdk1}]}{\partial t} &= D\nabla^2[\text{Cyclin B-Cdk1}] \\
 &\quad + k_a ([\text{Cdk1}]_{\text{tot}} - [\text{Cyclin B-Cdk1}] - [\text{Cyclin B-Cdk1-Yp}] \\
 &\quad - [\text{Cyclin B-Cdk1-YpTp}] - [\text{Cyclin B-Cdk1-Tp}]) [\text{Cyclin B}] \\
 &\quad - k_d[\text{Cyclin B-Cdk1}] - k_{\text{dest}}[\text{APC}]_{\text{act}}[\text{Cyclin B-Cdk1}]
 \end{aligned}$$

$$\begin{aligned}
& -k_{\text{wee1}}[\text{Wee1}]_{\text{act}}[\text{Cyclin B-Cdk1}] \\
& -k_{\text{wee1,basal}}([\text{Wee1}]_{\text{tot}} - [\text{Wee1}]_{\text{act}})[\text{Cyclin B-Cdk1}] \\
& +k_{\text{cdc25}}[\text{Cdc25}]_{\text{act}}[\text{Cyclin B-Cdk1-Yp}] \\
& +k_{\text{cdc25,basal}}([\text{Cdc25}]_{\text{tot}} - [\text{Cdc25}]_{\text{act}})[\text{Cyclin B-Cdk1-Yp}] \\
\frac{\partial[\text{Cyclin B-Cdk1-Yp}]}{\partial t} = & D\nabla^2[\text{Cyclin B-Cdk1-Yp}] \\
& +k_{\text{wee1}}[\text{Wee1}]_{\text{act}}[\text{Cyclin B-Cdk1}] \\
& +k_{\text{wee1,basal}}([\text{Wee1}]_{\text{tot}} - [\text{Wee1}]_{\text{act}})[\text{Cyclin B-Cdk1}] \\
& -k_{\text{cdc25}}[\text{Cdc25}]_{\text{act}}[\text{Cyclin B-Cdk1-Yp}] \\
& -k_{\text{cdc25,basal}}([\text{Cdc25}]_{\text{tot}} - [\text{Cdc25}]_{\text{act}})[\text{Cyclin B-Cdk1-Yp}] \\
& -k_{\text{cak}}[\text{Cyclin B-Cdk1-Yp}] + k_{\text{pp2c}}[\text{Cyclin B-Cdk1-YpTp}] \\
& -k_{\text{dest}}[\text{APC}]_{\text{act}}[\text{Cyclin B-Cdk1-Yp}] \\
\frac{\partial[\text{Cyclin B-Cdk1-YpTp}]}{\partial t} = & D\nabla^2[\text{Cyclin B-Cdk1-YpTp}] \\
& +k_{\text{cak}}[\text{Cyclin B-Cdk1-Yp}] - k_{\text{pp2c}}[\text{Cyclin B-Cdk1-YpTp}] \\
& -k_{\text{cdc25}}[\text{Cdc25}]_{\text{act}}[\text{Cyclin B-Cdk1-YpTp}] \\
& -k_{\text{cdc25,basal}}([\text{Cdc25}]_{\text{tot}} - [\text{Cdc25}]_{\text{act}})[\text{Cyclin B-Cdk1-YpTp}] \\
& +k_{\text{wee1}}[\text{Wee1}]_{\text{act}}[\text{Cyclin B-Cdk1-Tp}] \\
& +k_{\text{wee1,basal}}([\text{Wee1}]_{\text{tot}} - [\text{Wee1}]_{\text{act}})[\text{Cyclin B-Cdk1-Tp}] \\
& -k_{\text{dest}}[\text{APC}]_{\text{act}}[\text{Cyclin B-Cdk1-YpTp}] \\
\frac{\partial[\text{Cyclin B-Cdk1-Tp}]}{\partial t} = & D\nabla^2[\text{Cyclin B-Cdk1-Tp}] \\
& +k_{\text{cdc25}}[\text{Cdc25}]_{\text{act}}[\text{Cyclin B-Cdk1-YpTp}] \\
& +k_{\text{cdc25,basal}}([\text{Cdc25}]_{\text{tot}} - [\text{Cdc25}]_{\text{act}})[\text{Cyclin B-Cdk1-YpTp}] \\
& -k_{\text{wee1}}[\text{Wee1}]_{\text{act}}[\text{Cyclin B-Cdk1-Tp}] \\
& -k_{\text{wee1,basal}}([\text{Wee1}]_{\text{tot}} - [\text{Wee1}]_{\text{act}})[\text{Cyclin B-Cdk1-Tp}] \\
& -k_{\text{dest}}[\text{APC}]_{\text{act}}[\text{Cyclin B-Cdk1-Tp}] \\
\frac{\partial[\text{Cdc25}]_{\text{act}}}{\partial t} = & D\nabla^2[\text{Cdc25}]_{\text{act}} \\
& +k_{\text{cdc25,on}} \left( \frac{[\text{Cyclin B-Cdk1-Tp}]^{n_{\text{cdc25}}}}{(EC50)_{\text{cdc25}}^{n_{\text{cdc25}}} + [\text{Cyclin B-Cdk1-Tp}]^{n_{\text{cdc25}}}} \right) \\
& \times ([\text{Cdc25}]_{\text{tot}} - [\text{Cdc25}]_{\text{act}}) - k_{\text{cdc25,off}}[\text{Cdc25}]_{\text{act}} \\
\frac{\partial[\text{Wee1}]_{\text{act}}}{\partial t} = & D\nabla^2[\text{Wee1}]_{\text{act}} \\
& -k_{\text{wee1,off}} \left( \frac{[\text{Cyclin B-Cdk1-Tp}]^{n_{\text{wee1}}}}{(EC50)_{\text{wee1}}^{n_{\text{wee1}}} + [\text{Cyclin B-Cdk1-Tp}]^{n_{\text{wee1}}}} \right) \\
& \times [\text{Wee1}]_{\text{act}} + k_{\text{wee1,on}}([\text{Wee1}]_{\text{tot}} - [\text{Wee1}]_{\text{act}})
\end{aligned}$$

$$\begin{aligned}
\frac{\partial [\text{Plx1}]_{\text{act}}}{\partial t} &= D \nabla^2 [\text{Plx1}]_{\text{act}} \\
&\quad + k_{\text{plx1,on}} \left( \frac{[\text{Cyclin B-Cdk1-Tp}]^{n_{\text{plx1}}}}{(EC50)_{\text{plx1}}^{n_{\text{plx1}}} + [\text{Cyclin B-Cdk1-Tp}]^{n_{\text{plx1}}}} \right) \\
&\quad \times ([\text{Plx1}]_{\text{tot}} - [\text{Plx1}]_{\text{act}}) - k_{\text{plx1,off}} [\text{Plx1}]_{\text{act}} \\
\frac{\partial [\text{APC}]_{\text{act}}}{\partial t} &= D \nabla^2 [\text{APC}]_{\text{act}} \\
&\quad + k_{\text{APC,on}} \left( \frac{[\text{Plx1}]_{\text{act}}^{n_{\text{APC}}}}{(EC50)_{\text{plx1}}^{n_{\text{APC}}} + [\text{Plx1}]_{\text{act}}^{n_{\text{APC}}}} \right) \\
&\quad \times ([\text{APC}]_{\text{tot}} - [\text{APC}]_{\text{act}}) - k_{\text{APC,off}} [\text{APC}]_{\text{act}}
\end{aligned}$$

In our simulations, each of the densities ( $[\text{Cyclin B}]$ ,  $[\text{Cyclin B-Cdk1}]$ ,  $[\text{Cyclin B-Cdk1-Yp}]$ ,  $[\text{Cyclin B-Cdk1-YpTp}]$ ,  $[\text{Cyclin B-Cdk1-Tp}]$ ,  $[\text{Cdc25}]_{\text{act}}$ ,  $[\text{Wee1}]_{\text{act}}$ ,  $[\text{Plx1}]_{\text{act}}$ ,  $[\text{APC}]_{\text{act}}$ ) are functions of both space and time. For the parameters, all concentrations are in arbitrary units (au), all times are in sec, and all rates are either in  $(\text{sec})^{-1}$  or  $(\text{au} \times \text{sec})^{-1}$ . Except where noted, the parameters are as follows:

$$\begin{aligned}
k_{\text{synth}} &= 0.02 \\
r &= 10 \\
D &= 0.001 \\
k_{\text{dest}} &= 0.01 \\
k_a &= 0.1 \\
k_d &= 0.001 \\
k_{\text{wee1}} &= 0.05 \\
k_{\text{wee1,basal}} &= k_{\text{wee1}}/r \\
k_{\text{cdc25}} &= 0.1 \\
k_{\text{cdc25,basal}} &= k_{\text{cdc25}}/r \\
[\text{Cyclin}]_{\text{tot}} &= 230 \\
[\text{Cdc25}]_{\text{tot}} &= 15 \\
[\text{Wee1}]_{\text{tot}} &= 15 \\
[\text{APC}]_{\text{tot}} &= 50 \\
[\text{Plx1}]_{\text{tot}} &= 50 \\
n_{\text{wee1}} &= 4 \\
n_{\text{cdc25}} &= 4 \\
n_{\text{APC}} &= 4 \\
n_{\text{plx1}} &= 4 \\
(EC50)_{\text{plx1}} &= 40
\end{aligned}$$

$$\begin{aligned}
(EC50)_{\text{wee1}} &= 40 \\
(EC50)_{\text{cdc25}} &= 40 \\
\text{APC} &= 40 \\
k_{\text{cdc25,on}} &= 1.75 \\
k_{\text{cdc25,off}} &= 0.2 \\
k_{\text{APC,on}} &= 1 \\
k_{\text{APC,off}} &= 0.15 \\
k_{\text{plx1,on}} &= 1 \\
k_{\text{plx1,off}} &= 0.15 \\
k_{\text{wee1,on}} &= 0.2 \\
k_{\text{wee1,off}} &= 1.75 \\
k_{\text{cak}} &= 0.8 \\
k_{\text{pp2c}} &= 0.008
\end{aligned}$$

Besides APC, the cell-cycle proteins have very similar molecular weights (listed below). Treating proteins as spheres, the radius of the protein  $r$  scales as  $M^{1/3}$ , where  $M$  is the mass of the protein. From the Stokes-Einstein relation, the diffusion constant ( $D$ ) in low Reynolds number liquids scales as  $r^{-1}$ . Based on the Stokes-Einstein relation, a two-fold increase in the mass of the protein reduces  $D$  by 20%, and a five-fold increase in the protein mass reduces  $D$  by 40%. Thus, we set all diffusion constants to be equal and within the range of *in vivo* measurements for our simulations. We also note that  $D$  can be affected by specific or non-specific *in vivo* interactions.

Table S1: Molecular weights of cell-cycle proteins

| Species       | MW (kDa) |
|---------------|----------|
| Cyclin B-Cdk1 | 79.4     |
| Wee1          | 67       |
| Cdc25         | 60.3     |
| Plx1          | 68.13    |
| Cyclin B      | 44.92    |
| Cdk1          | 34.52    |
| APC           | 300      |

## References

- [1] Pomerening J. R., Kim S. Y., and Ferrell J.E. (2005) Systems-level Dissection of the Cell Cycle Oscillator: Bypassing Positive Feedback Produces Damped Oscillations. *Cell* **122** 565-578.
- [2] Hartley R. S., Rempel R. E., and Maller J.L. (1996) In vivo regulation of the early embryonic cell cycle in *Xenopus*. *Developmental Biology* **173** 408-419.
- [3] Hershko A., Ganoth D., Sudakin V., Dahan A., Cohen L.H., *et al.* (1994) Components of a system that ligates cyclin to ubiquitin and their regulation by the protein kinase cdc2. *Journal of Biological Chemistry* **269** 4940-4946.
- [4] King R.W., Peters J., Tugendreich S., Rolfe M., Hieter P., *et al.* (1995) A 20S complex containing CDC27 and CDC16 catalyzes the mitosis-specific conjugation of ubiquitin to cyclin B. *Cell*, **81** 279-288.
- [5] Peters J.M. (2002) The anaphase-promoting complex: Proteolysis in mitosis and beyond. *Molecular Cell* **9** 931-943.
